# Supplementary material for: Live imaging molecular changes in junctional tension upon VE-cadherin in zebrafish
Source: PubMed Central journal article supplement (PMC5680264; doi:10.1038/s41467-017-01325-6), 2017-11-10
Supplement: 41467_2017_1325_MOESM3_ESM.pdf [file 41467_2017_1325_MOESM3_ESM.pdf]

## Description of Additional Supplementary Files

File Name: Supplementary Movie 1

Description: **Representative video of *kdr/kdr1* morphants with intact blood circulation.**

Left: Video of bright field z-stack taken from un-injected control embryo at 3 dpf showing circulating blood cells. Right: Representative video of bright field z-stack taken from *kdr/kdr1* MO injected embryo at 3 dpf showing blood circulation.
